# Supplementary material for: Supramolecular Cu(ii) nanoparticles supported on a functionalized chitosan containing urea and thiourea bridges as a recoverable nanocatalyst for efficient synthesis of 1H-tetrazoles
Source: Royal Society of Chemistry journal article supplement (doi:10.1039/d3ra01989f), 2023-01-01

## **Electronic Supplementary Information**

### **Supramolecular Cu(II) nanoparticles supported on a functionalized chitosan containing urea and thiourea bridges as a recoverable nanocatalyst for efficient synthesis of 1*H*-tetrazoles**

Shirin Bondarian, Mohammad G. Dekamin\*, Ehsan Valiey, M. Reza Naimi-Jamal

*<sup>a</sup>Pharmaceutical and Heterocyclic Compounds Research Laboratory Department of Chemistry Iran University of Science and Technology. Email: mdekamin@iust.ac.ir*

| Contents                                                                                                                                                                                                                                          | Page    |
|---------------------------------------------------------------------------------------------------------------------------------------------------------------------------------------------------------------------------------------------------|---------|
| Title page                                                                                                                                                                                                                                        | S1      |
| Graphical Abstract                                                                                                                                                                                                                                | S3      |
| <b>Scheme S1</b> Model reaction and Catalyst Preparation                                                                                                                                                                                          | S4-S5   |
| <b>Fig. S1</b> (a) Tetrazole scaffold as bioisostere of the carboxylic group, Cl-amidine, or heterocyclic furan ring in medicinal chemistry; (b) Active pharmaceutical ingredients having tetrazole moiety: Losartan, Forasartan, and Pemirolast. | S6      |
| <b>Fig. S2</b> FT-IR spectra of the commercial CS, PMDA-TS, CS-TDI-PMDA-TS, and the CS-TDI-PMDA-TS-Cu( II ) nanocomposite (1).                                                                                                                    | S7      |
| <b>Fig. S3</b> FESEM images of the CS-TDI-PMDA-TS-Cu( II ) nanocomposite (1).                                                                                                                                                                     | S7-S8   |
| <b>Fig. S4</b> TGA/DTA analysis of the CS-TDI-PMDA-TS-Cu( II ) nanomaterial (1).                                                                                                                                                                  | S8      |
| <b>Fig. S5</b> The EDX spectrum of the CS-TDI-PMDA-TS-Cu( II ) nanocatalyst (1).                                                                                                                                                                  | S9      |
| <b>Fig. S6</b> Mapping of the CS-TDI-PMDA-TS-Cu( II ) nanocatalyst (1).                                                                                                                                                                           | S9      |
| <b>Fig. S7</b> X-ray powder diffraction (XRD) pattern for CS-TDI-PMDA-TS-Cu( II ) nanocatalyst (1).                                                                                                                                               | S10     |
| <b>Table S1.</b> Optimization of the conditions for 1 <i>H</i> -tetrazole in the model reaction of malononitrile (2), NaN <sub>3</sub> (3), and 4-chlorobenzaldehyde (4a) under different conditions.                                             | S10-S11 |
| <b>Table S2</b> Synthesis of 5-substituted-1 <i>H</i> -tetrazole derivatives 5a-q catalyzed by CS-TDI-PMDA-TS-Cu( II ) (1).                                                                                                                       | S11-S14 |
| <b>Table S3</b> Comparison of the catalytic efficiency of the CS-TDI-PMDA-TS-Cu( II ) (1) with other catalytic systems.                                                                                                                           | S14-S15 |
| <b>Fig. S8</b> Reusability data for the CS-TDI-PMDA-TS-Cu( II ) nanocatalyst (1) in the synthesis of 5a.                                                                                                                                          | S15     |
| <b>Scheme S2</b> The proposed mechanism for the synthesis of tetrazole derivatives catalyzed by the heterogeneous CS-TDI-PMDA-TS-Cu(II) (1) nanocatalyst.                                                                                         | S16     |
| <b>Fig. S9</b> FT-IR spectrum of ( <i>E</i> )-3-(2-chlorophenyl)-2-(1 <i>H</i> -tetrazole-5-yl) acrylonitrile (5b).                                                                                                                               | S17     |
| <b>Fig. S10</b> <sup>1</sup> H NMR spectrum of ( <i>E</i> )-3-(2-chlorophenyl)-2-(1 <i>H</i> -tetrazole-5-yl) acrylonitrile (5b).                                                                                                                 | S18     |
| <b>Fig. S11</b> Expanded <sup>1</sup> H NMR spectrum of ( <i>E</i> )-3-(2-chlorophenyl)-2-(1 <i>H</i> -tetrazole-5-yl) acrylonitrile (5b).                                                                                                        | S19     |
| <b>Fig. S12</b> FT-IR spectrum of ( <i>E</i> )-3-(4-methoxyphenyl)-2-(1 <i>H</i> -tetrazole-5-yl) acrylonitrile (5l).                                                                                                                             | S20     |
| <b>Fig. S13</b> <sup>1</sup> H NMR spectrum of ( <i>E</i> )-3-(4-methoxyphenyl)-2-(1 <i>H</i> -tetrazole-5-yl) acrylonitrile (5l).                                                                                                                | S20     |
| <b>Fig. S14</b> Expanded <sup>1</sup> H NMR spectrum of ( <i>E</i> )-3-(4-methoxyphenyl)-2-(1 <i>H</i> -tetrazole-5-yl) acrylonitrile (5l).                                                                                                       | S21     |
| <b>Fig. S15</b> FT-IR spectrum of ( <i>E</i> )-3-(4-methylphenyl)-2-(1 <i>H</i> -tetrazole-5-yl) acrylonitrile (5n).                                                                                                                              | S22     |
| <b>Fig. S16</b> <sup>1</sup> H NMR spectrum of ( <i>E</i> )-3-(4-Methylphenyl)-2-(1 <i>H</i> -tetrazole-5-yl) acrylonitrile (5n).                                                                                                                 | S22     |
| <b>Fig. S17</b> Expanded <sup>1</sup> H NMR spectrum of ( <i>E</i> )-3-(4-methylphenyl)-2-(1 <i>H</i> -tetrazole-5-yl) acrylonitrile (5n).                                                                                                        | S23     |

## Graphical Abstract

# Cu(II) nanoparticles supported on a functionalized chitosan containing urea and thiourea bridges as a recoverable nanocatalyst for efficient synthesis of 1*H*-tetrazoles

Shirin Bondarian, Mohammad G. Dekamin\*, Ehsan Valiey, M. Reza Naimi-Jamal

A cost-effective and convenient method for supporting of Cu(II) nanoparticles (Cu NPs) on the chitosan containing urea and thiourea bridges backbone using toluene-2,4-diisocyanate (TDI) and pyromellitic dianhydride (PMDA) linkers was designed and characterized by applicable spectroscopic and analytical techniques. The heterogeneous low-loaded Cu(II) nanoparticles was successfully employed in the multicomponent cascade Knoevenagel condensation/click 1,3-dipolar cycloaddition in good to excellent yields with proper reusability.

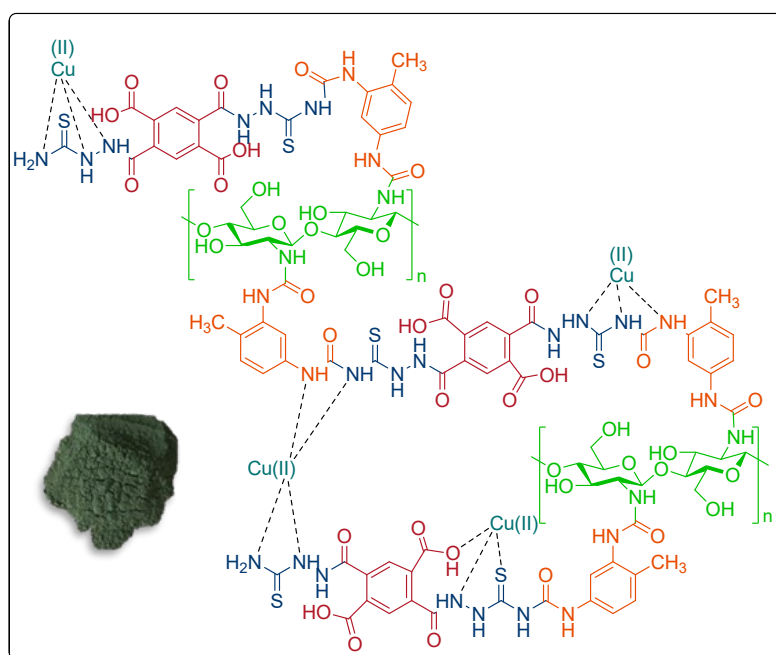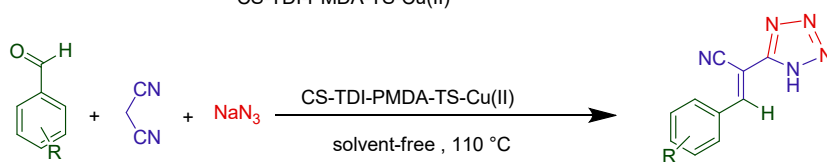

## Catalyst Preparation:

The graphical procedure for the synthesis of the catalyst is shown in **Scheme S1**.

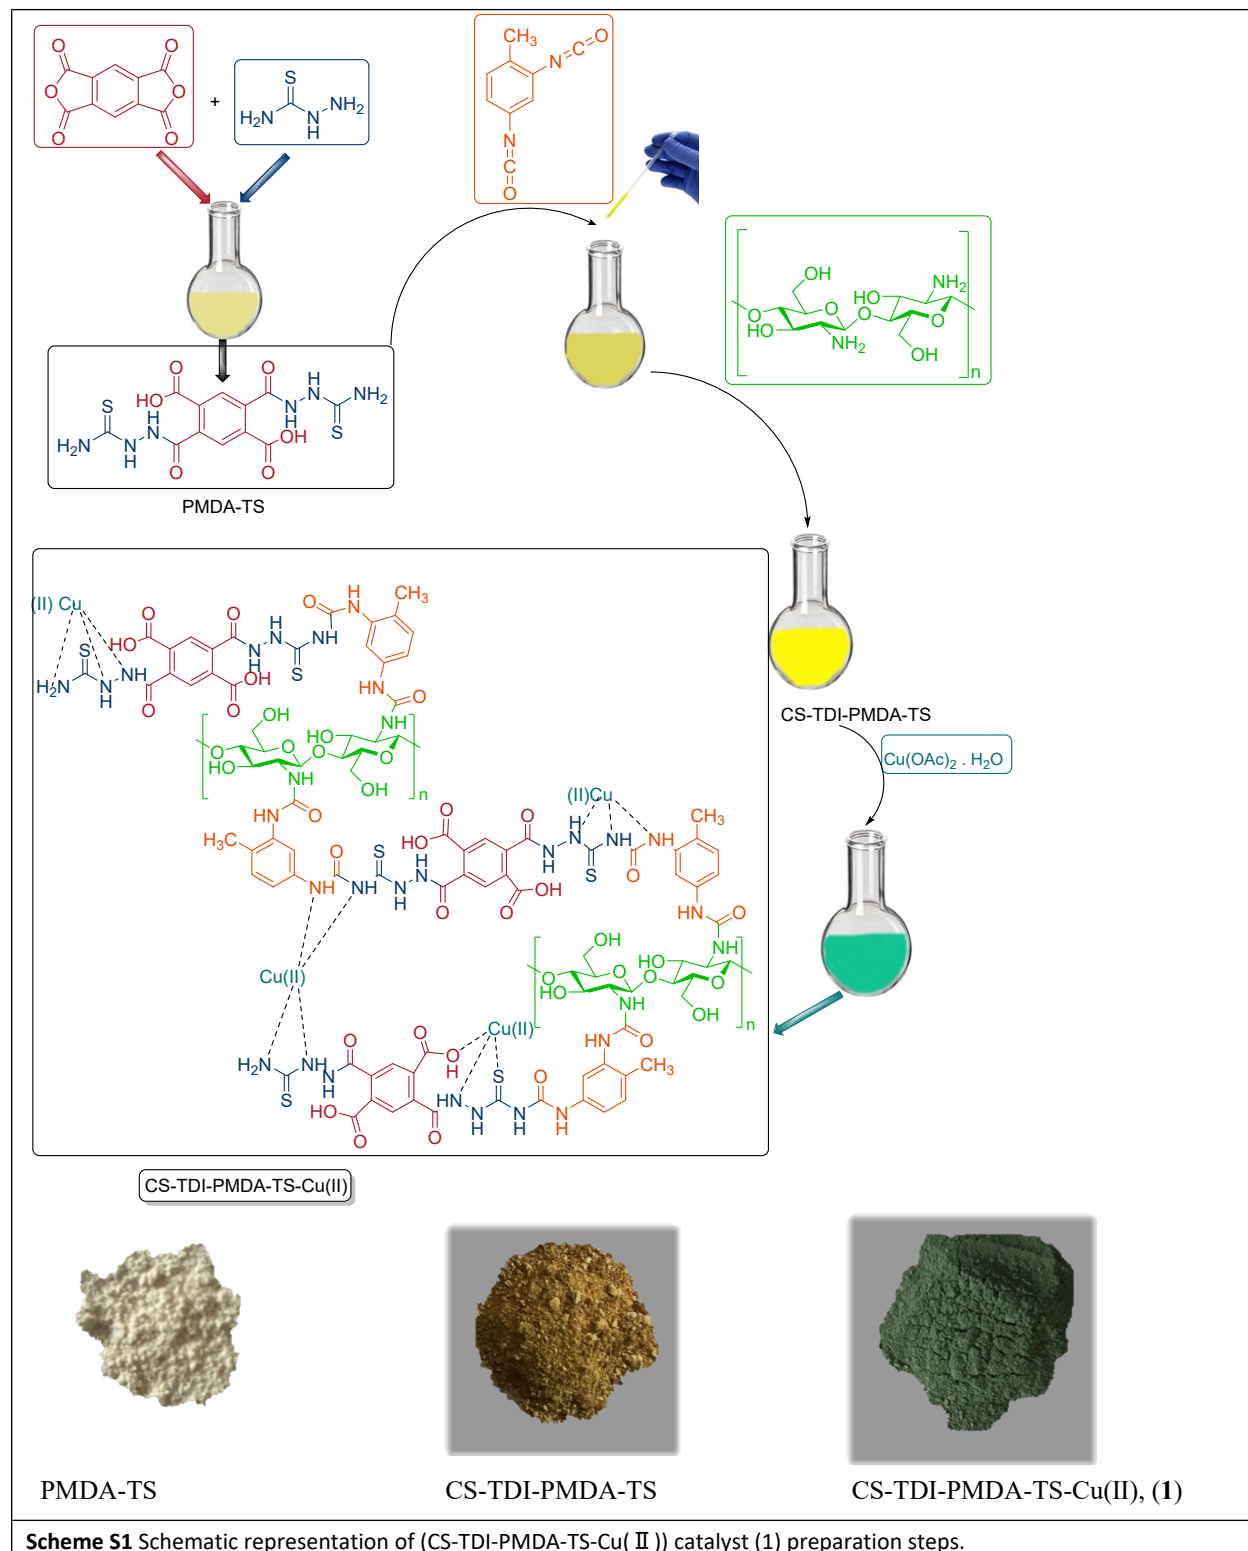

**Scheme S1** Schematic representation of (CS-TDI-PMDA-TS-Cu(II)) catalyst (1) preparation steps.

### Model Reaction:

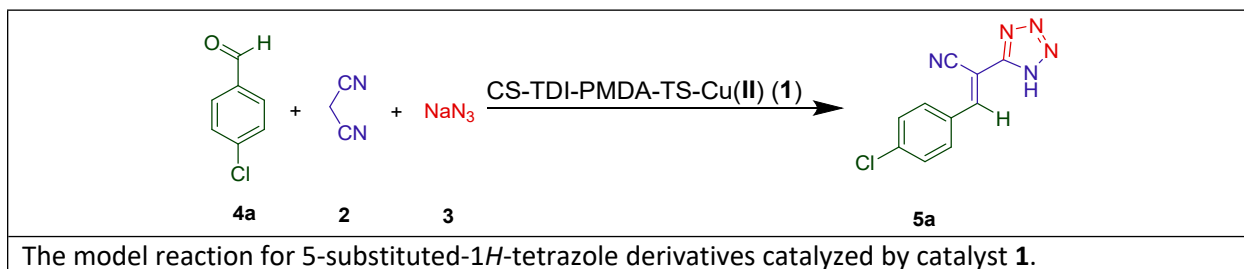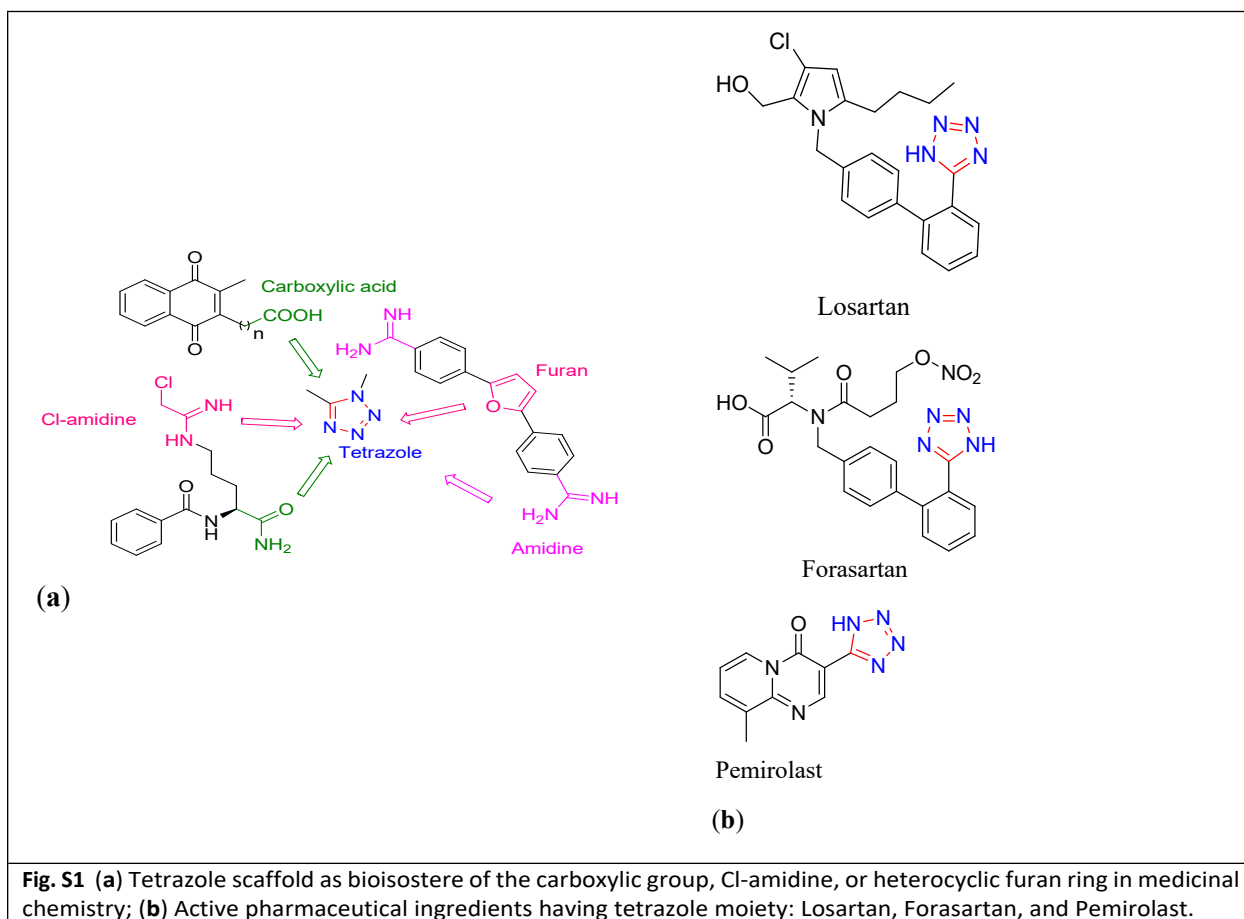

## FTIR Spectrums:

The FTIR spectra from initiators are illustrated in (Fig. S2).

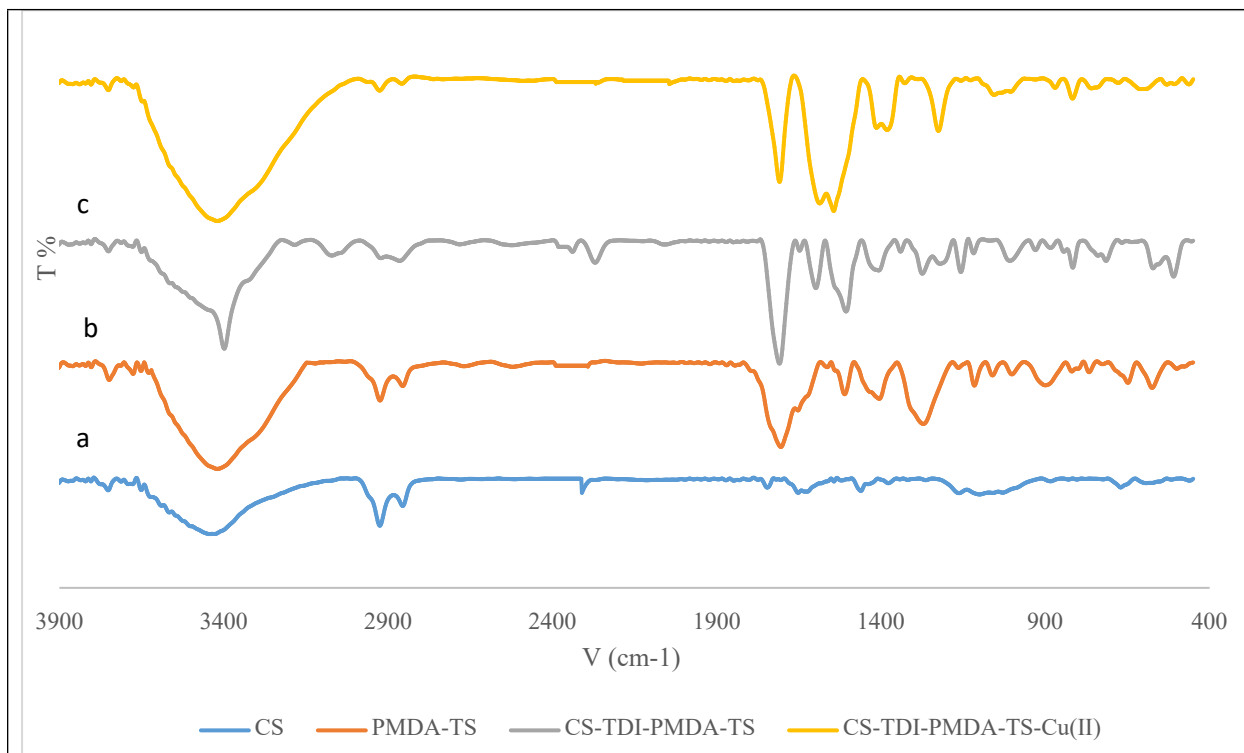

**Fig. S2** FT-IR spectra of the commercial CS, PMDA-TS, CS-TDI-PMDA-TS, and the CS-TDI-PMDA-TS-Cu(II) nanocomposite (**1**).

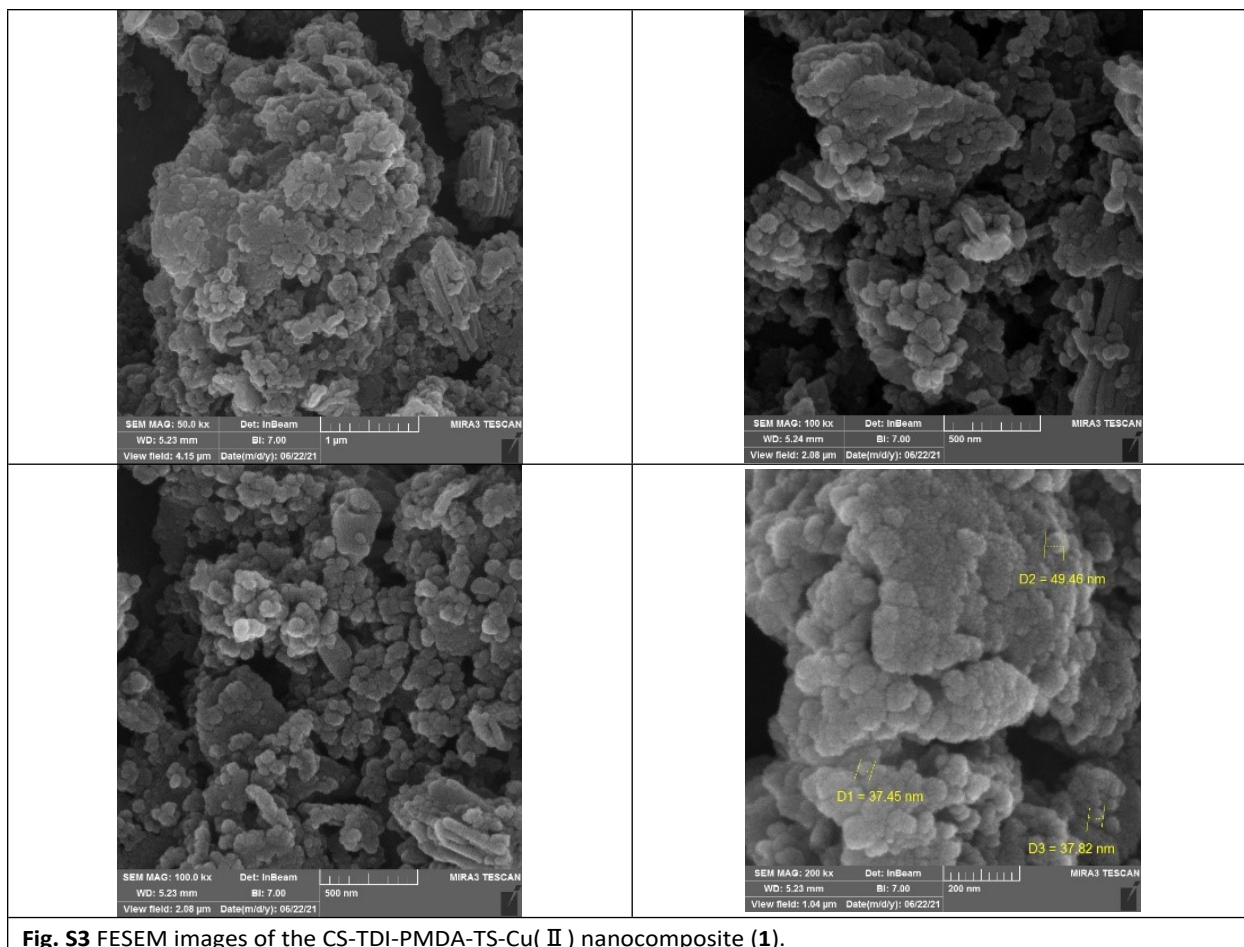

**Fig. S3** FESEM images of the CS-TDI-PMDA-TS-Cu( II) nanocomposite (1).

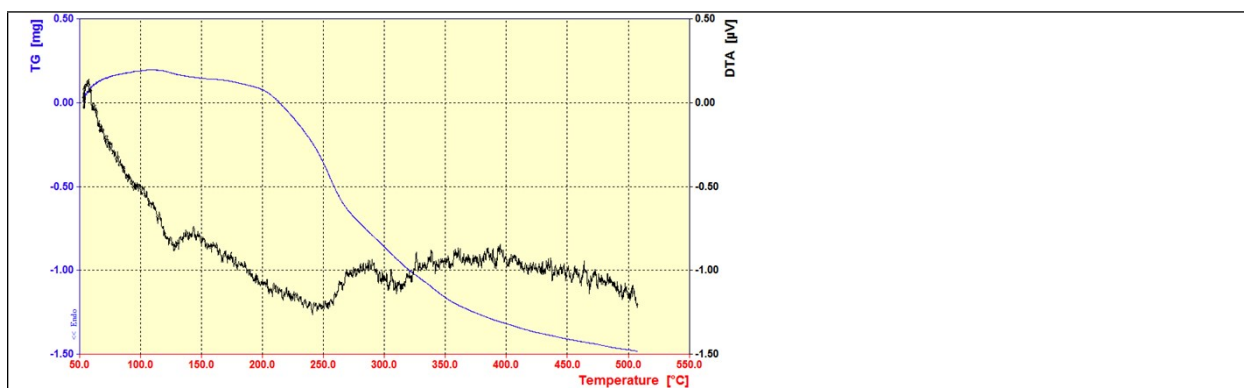

**Fig. S4** TGA/DTA analysis of the CS-TDI-PMDA-TS-Cu( II) nanomaterial (1).

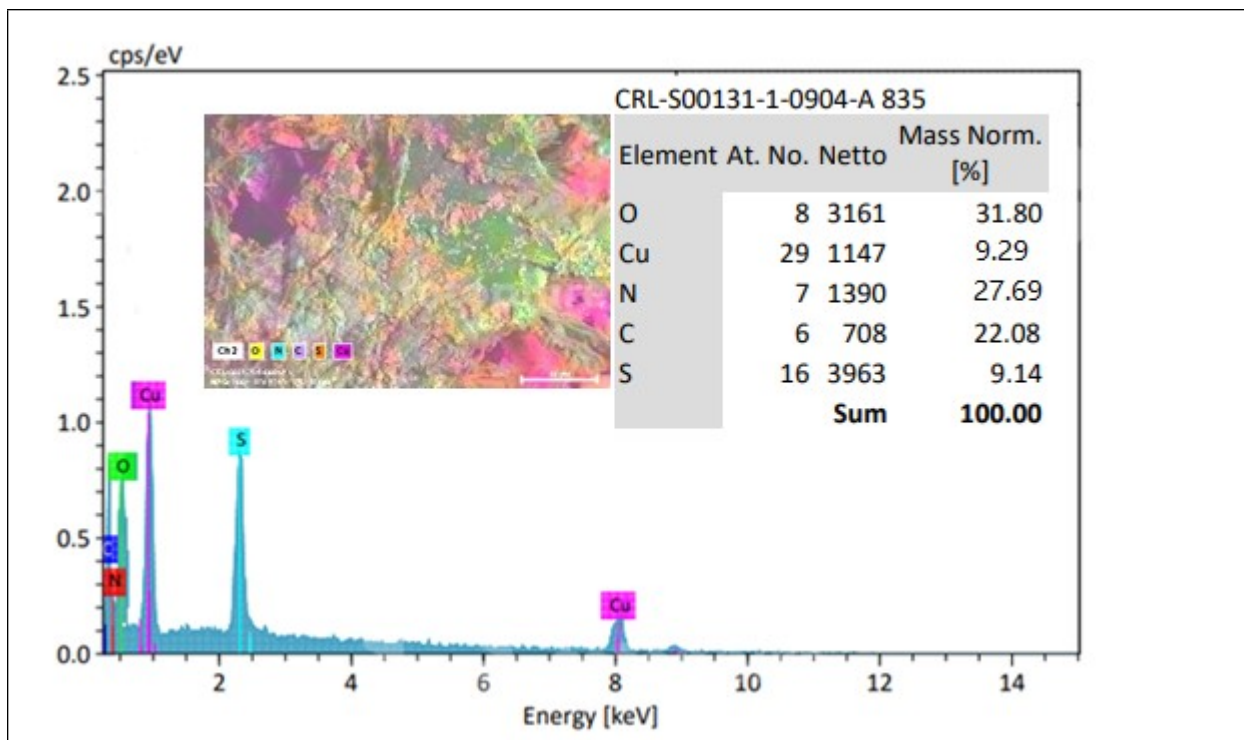

Fig. S5 The EDX spectrum of the CS-TDI-PMDA-TS-Cu(II) nanocatalyst (1).

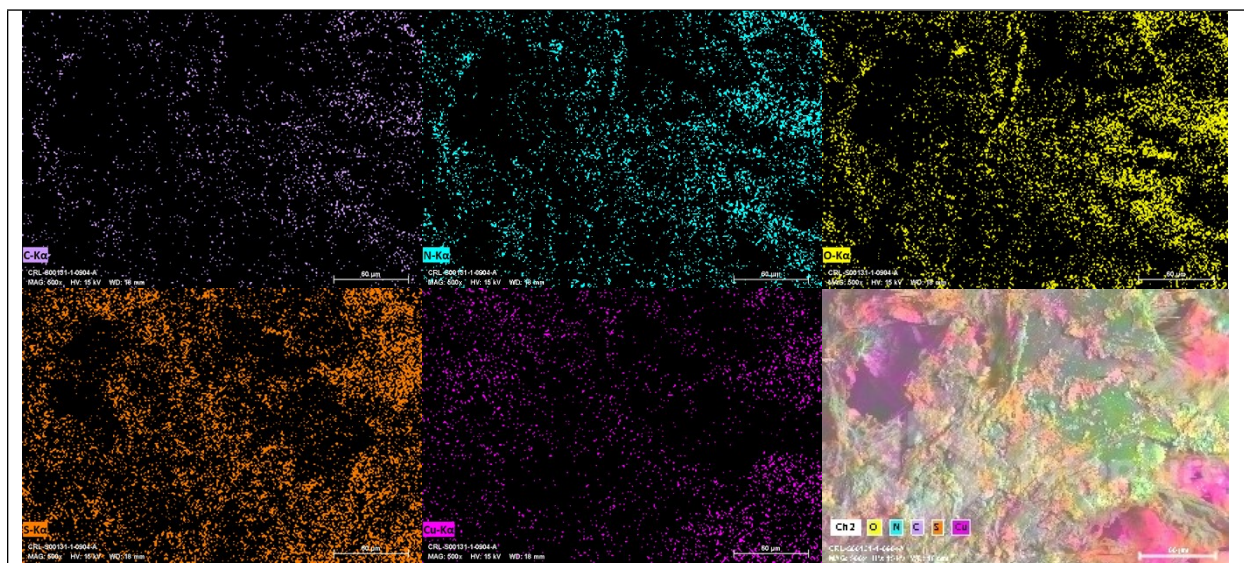

Fig. S6 Mapping of the CS-TDI-PMDA-TS-Cu(II) nanocatalyst (1).



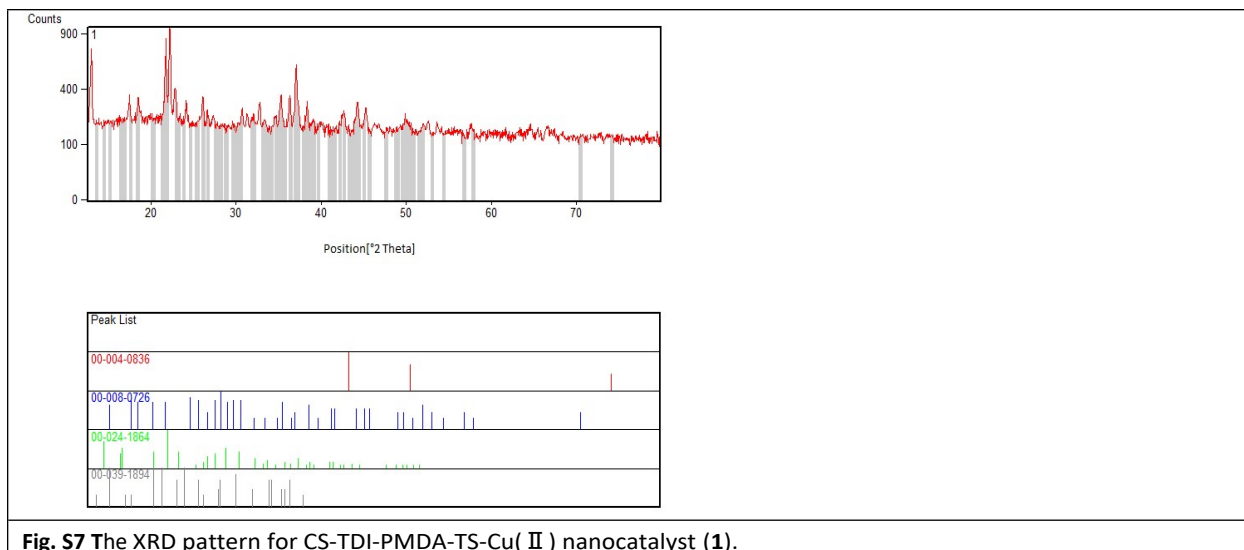

**Table S1** Optimization of the conditions for 1*H*-tetrazole in the model reaction of malononitrile ( 2 ), NaN<sub>3</sub> ( 3 ), and 4-chlorobenzaldehyde ( 4a ) under different conditions<sup>a</sup>

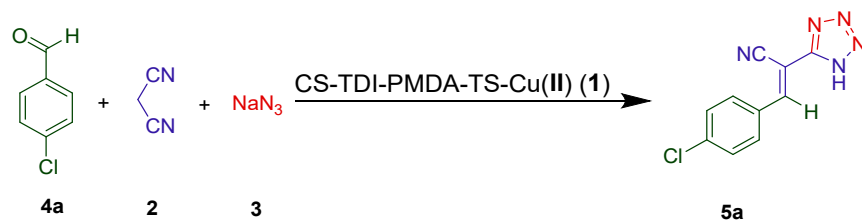

| Entry | Catalyst                             | Catalyst loading (mg) | Solvent                         | Temperature (°C) | Time (min) | yield <sup>b</sup> of (%) 5a |
|-------|--------------------------------------|-----------------------|---------------------------------|------------------|------------|------------------------------|
| 1     | -                                    | -                     | Solvent-Free                    | 110              | 24 h       | 60                           |
| 2     | -                                    | -                     | DMF                             | Reflux           | 20 h       | 50                           |
| 3     | CS-TDI-PMDA-TS-Cu( II ) ( 1 )        | 10                    | Solvent-Free                    | 110              | 30         | 65                           |
| 4     | CS-TDI-PMDA-TS-Cu( II ) ( 1 )        | 15                    | Solvent-Free                    | 110              | 30         | 80                           |
| 5     | <b>CS-TDI-PMDA-TS-Cu( II ) ( 1 )</b> | <b>20</b>             | <b>Solvent-Free</b>             | <b>110</b>       | <b>30</b>  | <b>92</b>                    |
| 6     | CS-TDI-PMDA-TS-Cu( II ) ( 1 )        | 40                    | Solvent-Free                    | 110              | 45         | 94                           |
| 7     | CS-TDI-PMDA-TS-Cu( II ) ( 1 )        | 20                    | EtOH                            | Reflux           | 60         | 80                           |
| 8     | CS-TDI-PMDA-TS-                      | 20                    | CH <sub>2</sub> Cl <sub>2</sub> | Reflux           | 60         | 50                           |

|    |                           |    |                  |        |     |    |
|----|---------------------------|----|------------------|--------|-----|----|
|    | Cu(II) (1)                |    |                  |        |     |    |
| 9  | CS-TDI-PMDA-TS-Cu(II) (1) | 20 | H <sub>2</sub> O | Reflux | 60  | 87 |
| 10 | CS-TDI-PMDA-TS-Cu(II) (1) | 20 | DMF              | Reflux | 60  | 90 |
| 11 | CS-TDI-PMDA-TS-Cu(II) (1) | 20 | EtOAc            | Reflux | 60  | 55 |
| 12 | CS-TDI-PMDA-TS-Cu(II) (1) | 20 | Solvent-Free     | 120    | 50  | 93 |
| 13 | CS-TDI-PMDA-TS-Cu(II) (1) | 20 | Solvent-Free     | 100    | 70  | 90 |
| 14 | CS-TDI-PMDA-TS-Cu(II) (1) | 20 | Solvent-Free     | 80     | 110 | 60 |

<sup>a</sup> Reaction conditions: malononitrile (**2**, 1.1 mmol), sodium azide (**3**, 1.5 mmol), and 4-chlorobenzaldehyde (**4a**, 1 mmol) in the presence of 20 mg CS-TDI-PMDA-TS-Cu(II) nanocatalyst (**1**). <sup>b</sup> Isolated yield.

**Table S2** Synthesis of 5-substituted-1*H*-tetrazole derivatives **5a-q** catalyzed by CS-TDI-PMDA-TS-Cu(II) (**1**)<sup>a</sup>.

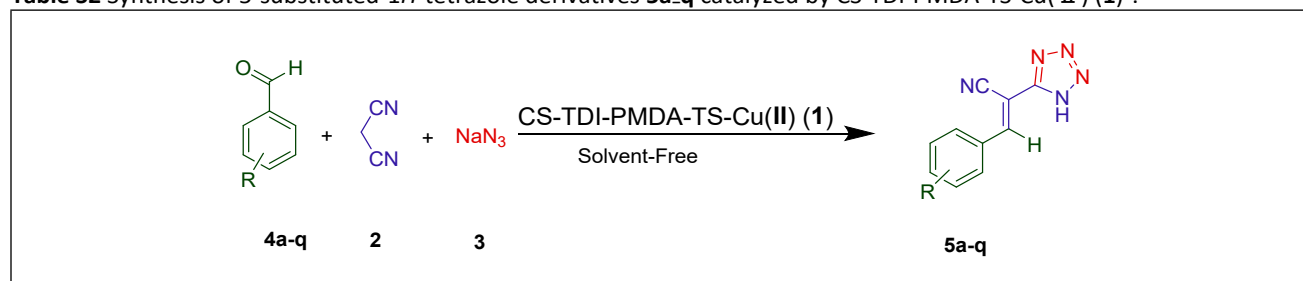

| Entry | Aldehyde (4) | Product (5) | Time (min) | Yield (%) <sup>b</sup> | M.p. (°C) [Obs.] | M.p. (°C) [Lit.] |
|-------|--------------|-------------|------------|------------------------|------------------|------------------|
| 1     |              |             | 40         | 92                     | 158-160          | 156-159          |

|   |                                                                                               |                                                                                               |    |    |         |         |
|---|-----------------------------------------------------------------------------------------------|-----------------------------------------------------------------------------------------------|----|----|---------|---------|
| 2 | 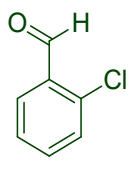 <p>4b</p>   |  <p>5b</p>   | 40 | 90 | 174-176 | 175-177 |
| 3 |  <p>4c</p>   |  <p>5c</p>   | 55 | 90 | 162-164 | 161-163 |
| 4 |  <p>4d</p>   |  <p>5d</p>   | 45 | 92 | 166-168 | 166-168 |
| 5 |  <p>4e</p> |  <p>5e</p> | 40 | 85 | 160-163 | 161-163 |
| 6 |  <p>4f</p> |  <p>5f</p> | 45 | 88 | 165-167 | 166-168 |

|    |                                                                                                                            |                                                                                                                                        |    |    |         |         |
|----|----------------------------------------------------------------------------------------------------------------------------|----------------------------------------------------------------------------------------------------------------------------------------|----|----|---------|---------|
| 7  | 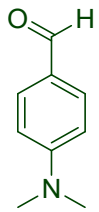<br><chem>CN(C)c1ccc(C=O)cc1</chem><br>4g | <br><chem>CN(C)c1ccc(C=C(C#N)N1=NN=N)cc1</chem><br>5g | 50 | 92 | 169-172 | 169-171 |
| 8  | <br><chem>Clc1cc(Cl)ccc1C=O</chem><br>4h  | <br><chem>Clc1cc(Cl)ccc1C=C(C#N)N1=NN=N</chem><br>5h  | 40 | 90 | 142-145 | 142-144 |
| 9  | <br><chem>c1cccnc1C=O</chem><br>4i        | <br><chem>c1cccnc1C=C(C#N)N1=NN=N</chem><br>5i       | 60 | 86 | 185-187 | 185-186 |
| 10 | <br><chem>c1ccccc1C=O</chem><br>4j      | <br><chem>c1ccccc1C=C(C#N)N1=NN=N</chem><br>5j      | 30 | 90 | 164-166 | 164-166 |
| 11 | <br><chem>Oc1ccc(C=O)cc1</chem><br>4k   | <br><chem>Oc1ccc(C=C(C#N)N1=NN=N)cc1</chem><br>5k   | 55 | 82 | 162-165 | 161-164 |
| 12 | <br><chem>COc1ccc(C=O)cc1</chem><br>4l  | <br><chem>COc1ccc(C=C(C#N)N1=NN=N)cc1</chem><br>5l  | 55 | 90 | 155-158 | 156-160 |

|    |                                                                                     |                                                                                     |    |    |         |         |
|----|-------------------------------------------------------------------------------------|-------------------------------------------------------------------------------------|----|----|---------|---------|
| 13 | 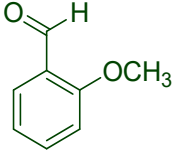   |    | 50 | 86 | 157-159 | 157-159 |
| 14 |    |    | 50 | 88 | 189-191 | 190-192 |
| 15 |    |    | 55 | 82 | 132-137 | 132-137 |
| 16 |  |  | 60 | 88 | 136-139 | 135-140 |
| 17 |  |  | 70 | 88 | 253-256 | 253-254 |

<sup>a</sup> Reaction conditions: malononitrile (**2**, 1.1 mmol), sodium azide (**3**, 1.5 mmol), aryl aldehyde (**4a-q**, 1 mmol) in the presence of CS-TDI-PMDA-TS-Cu (II) (**1**, 20 mg), 110 °C under solvent-free conditions. <sup>b</sup> Isolated yields.

**Table S3** Comparison of the catalytic efficiency of the CS-TDI-PMDA-TS-Cu (II) (**1**) with other catalytic systems.

| Entry | Catalyst                            | Catalyst loading | Reaction Conditions | Time (hour) | Yield (%) |              |
|-------|-------------------------------------|------------------|---------------------|-------------|-----------|--------------|
|       |                                     |                  |                     |             | Yield (%) | References   |
| 1     | CS-TDI-PMDA-TS-Cu (II) ( <b>1</b> ) | 20.0 mg          | Solvent-Free/110 °C | 30 min      | 92        | Present work |
| 2     | Nano-Fe <sub>3</sub> O <sub>4</sub> | 20 mol%          | Solvent-Free/80 °C  | 4.5         | 90        | 108          |

|    |                                                                     |          |                                  |     |    |     |
|----|---------------------------------------------------------------------|----------|----------------------------------|-----|----|-----|
| 3  | Fe <sub>3</sub> O <sub>4</sub> @fibroin-SO <sub>3</sub> H           | 10 mol%  | Solvent-Free/100 °C              | 2   | 86 | 113 |
| 4  | Fe <sub>3</sub> O <sub>4</sub> -CNT-SO <sub>3</sub> H nanocomposite | 20.0 mg  | Solvent-Free/80 °C               | 2.5 | 90 | 114 |
| 5  | NiO nanoparticles                                                   | 4.5 mg   | DMF/70 °C                        | 6   | 90 | 115 |
| 6  | NH-Cu( II )@MNP                                                     | 20.0 mg  | EtOH/80 °C                       | 5   | 92 | 116 |
| 7  | Zn (Mettalic)                                                       | 130.7 mg | H <sub>2</sub> O/50 °C           | 3   | 68 | 117 |
| 8  | (CuOTf) <sub>2</sub> .C <sub>6</sub> H <sub>6</sub>                 | 36.2 mg  | Toluene/r.t.                     | 7   | 81 | 118 |
| 9  | Fe(OAc) <sub>2</sub>                                                | 17.4 mg  | DMF/H <sub>2</sub> O (9:1) 80 °C | 24  | 89 | 119 |
| 10 | OPNSA                                                               | 45.4 mg  | Solvent-Free/100 °C              | 10  | 80 | 120 |

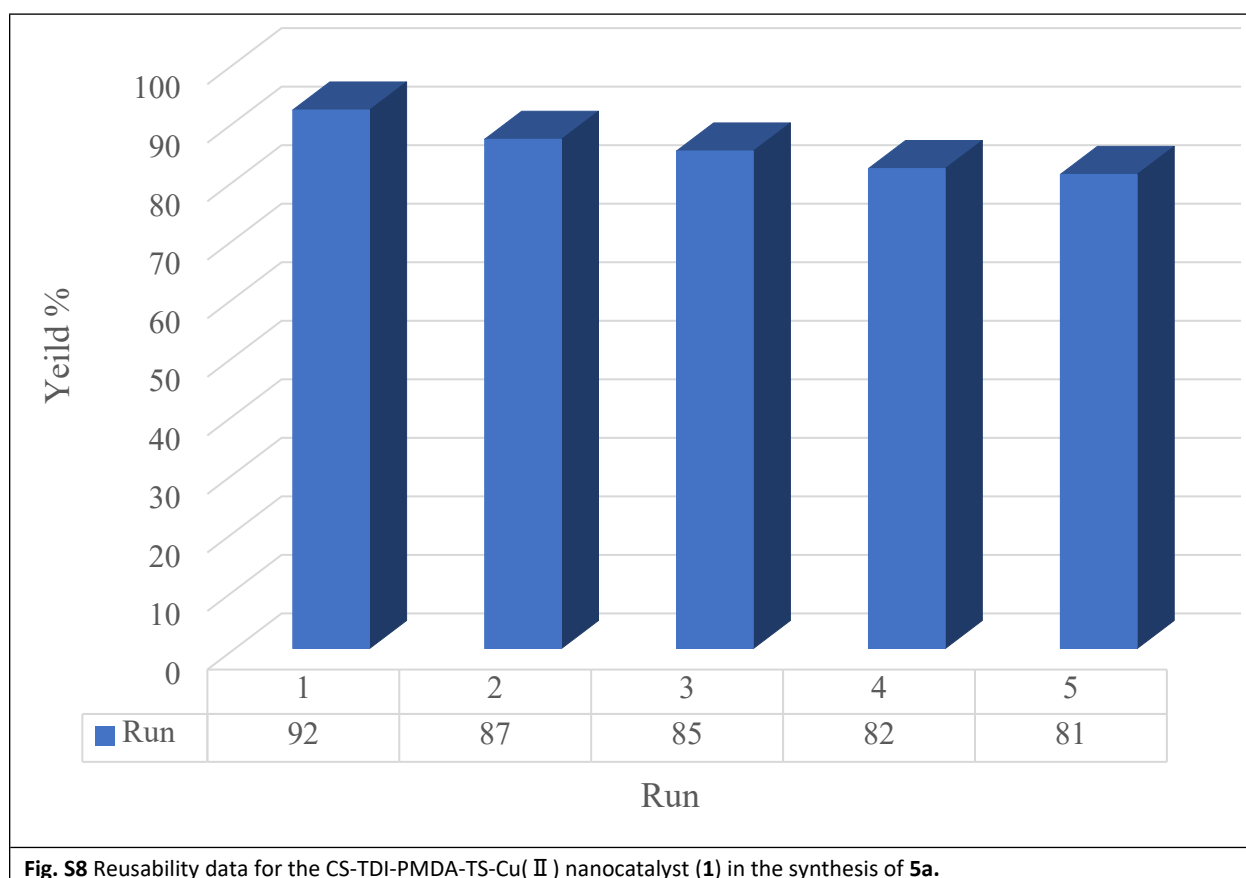

**Fig. S8** Reusability data for the CS-TDI-PMDA-TS-Cu( II ) nanocatalyst (1) in the synthesis of 5a.

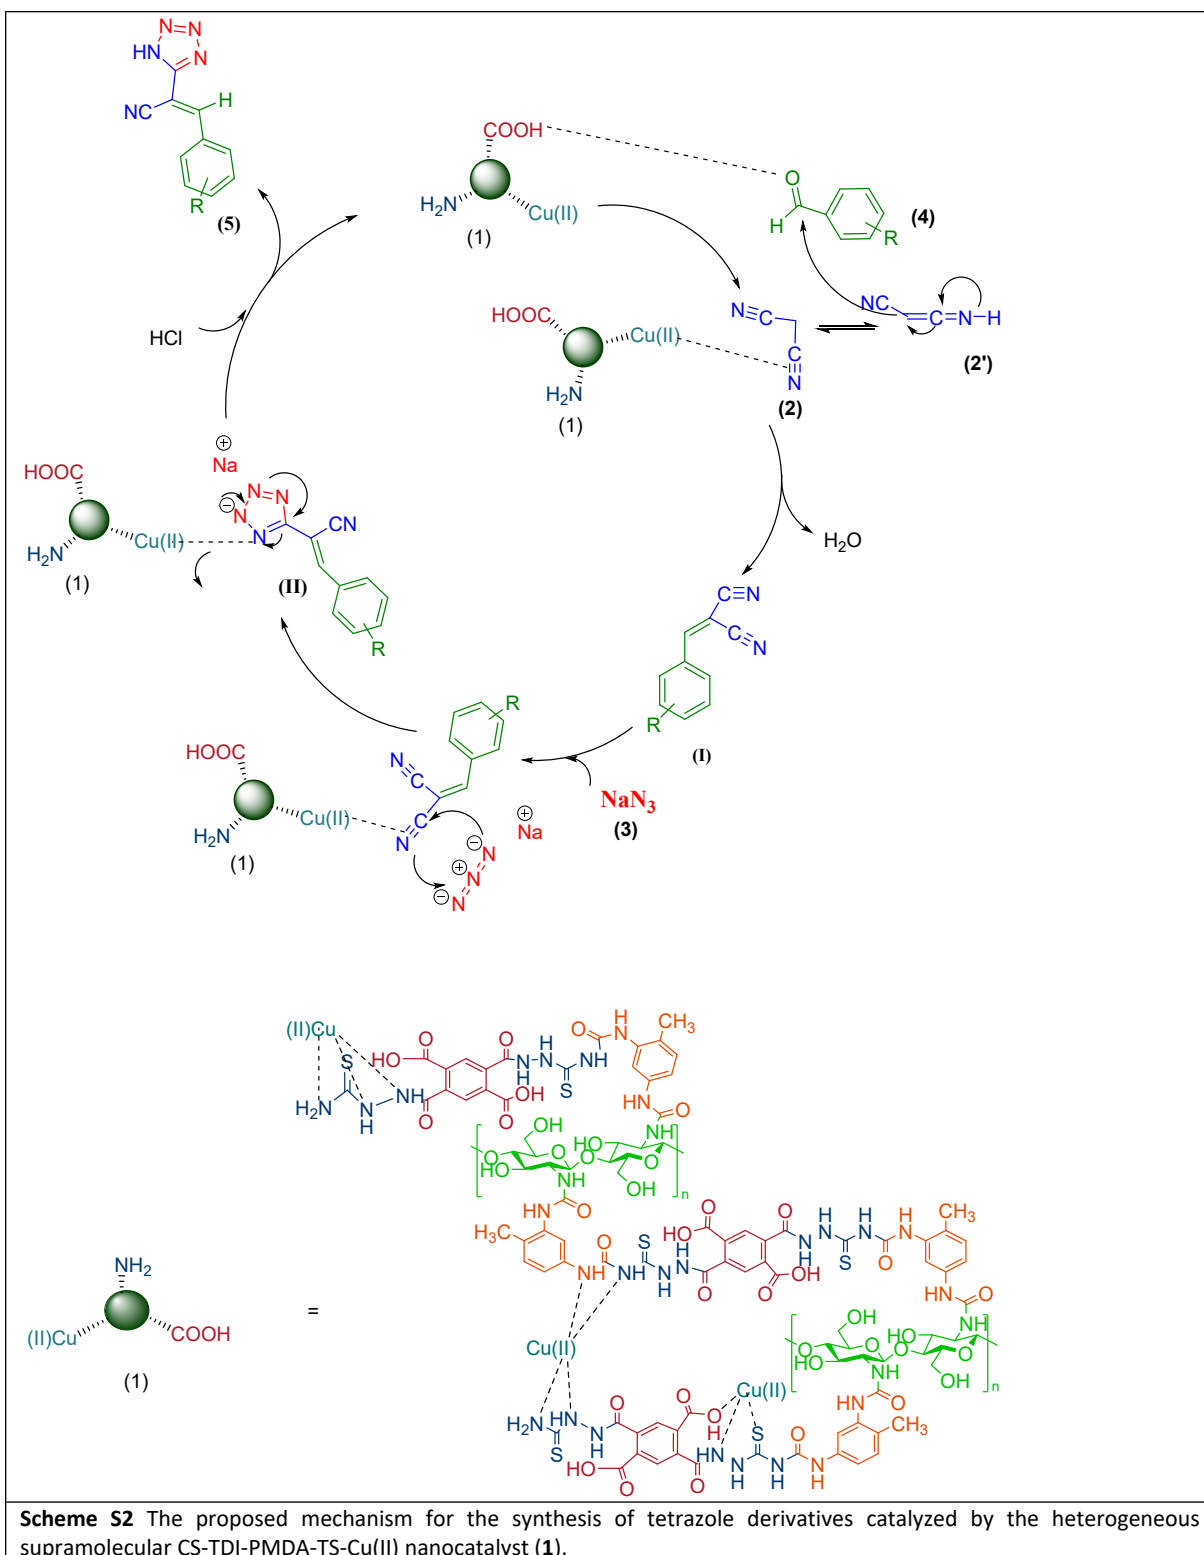

**Spectral data of the selected products**

**(E)-3-(2-chlorophenyl)-2-(1H-tetrazole-5-yl) acrylonitrile (5b):**

Cream solid powder; Mp: 174-176 °C; FT-IR (KBr)  $\nu$ : 3241, 3025, 2207, 1573, 1475, 973, 824, 672  $\text{cm}^{-1}$ ;  $^1\text{H}$  NMR (500 MHz,  $\text{DMSO}-d_6$ ):  $\delta$  (ppm) 7.55-7.57 (m, 2H), 7.65-7.67 (d,  $J = 8.4$  Hz, 1H), 8.10-8.11 (d,  $J = 6.3$  Hz, 1H), 8.42 (s, 1H, CH), 13.19 (s, 1H, NH).

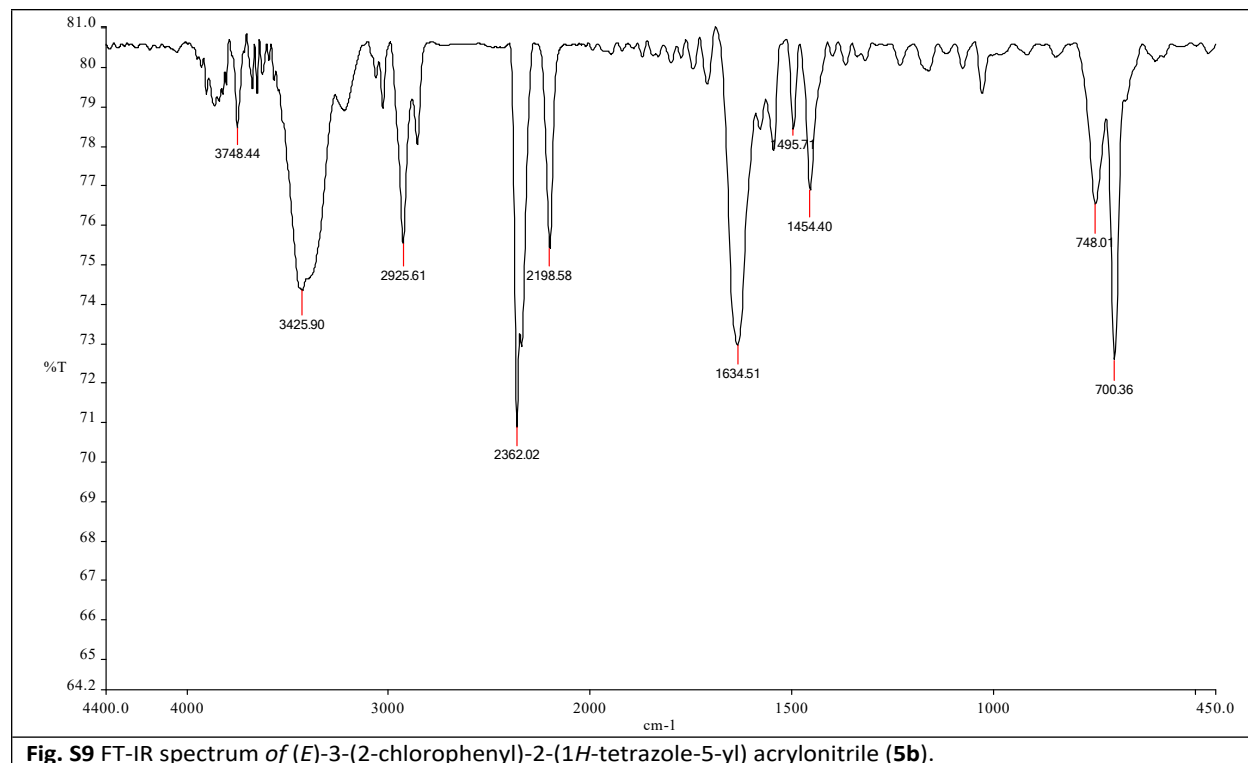



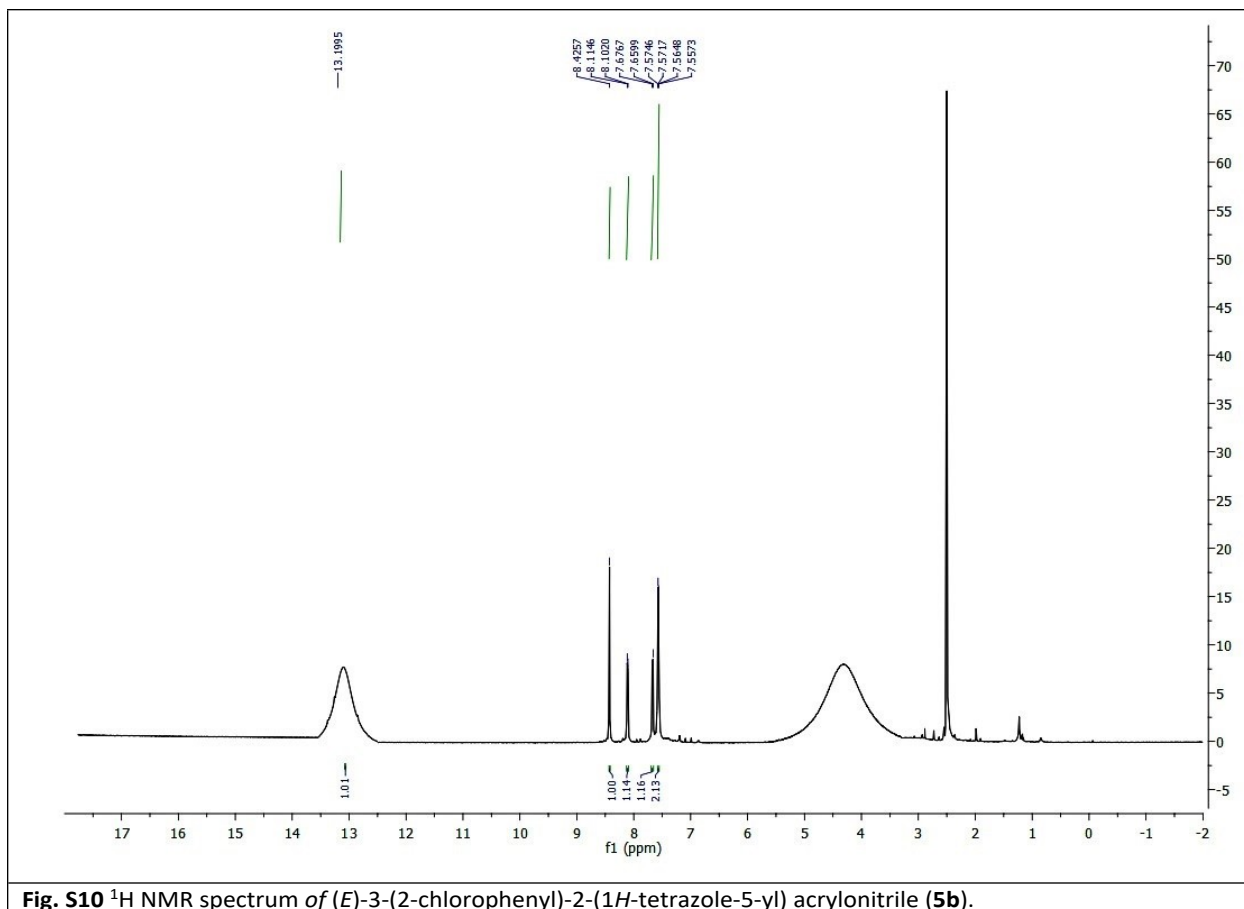

**Fig. S10**  $^1\text{H}$  NMR spectrum of *(E)*-3-(2-chlorophenyl)-2-(1H-tetrazole-5-yl) acrylonitrile (**5b**).

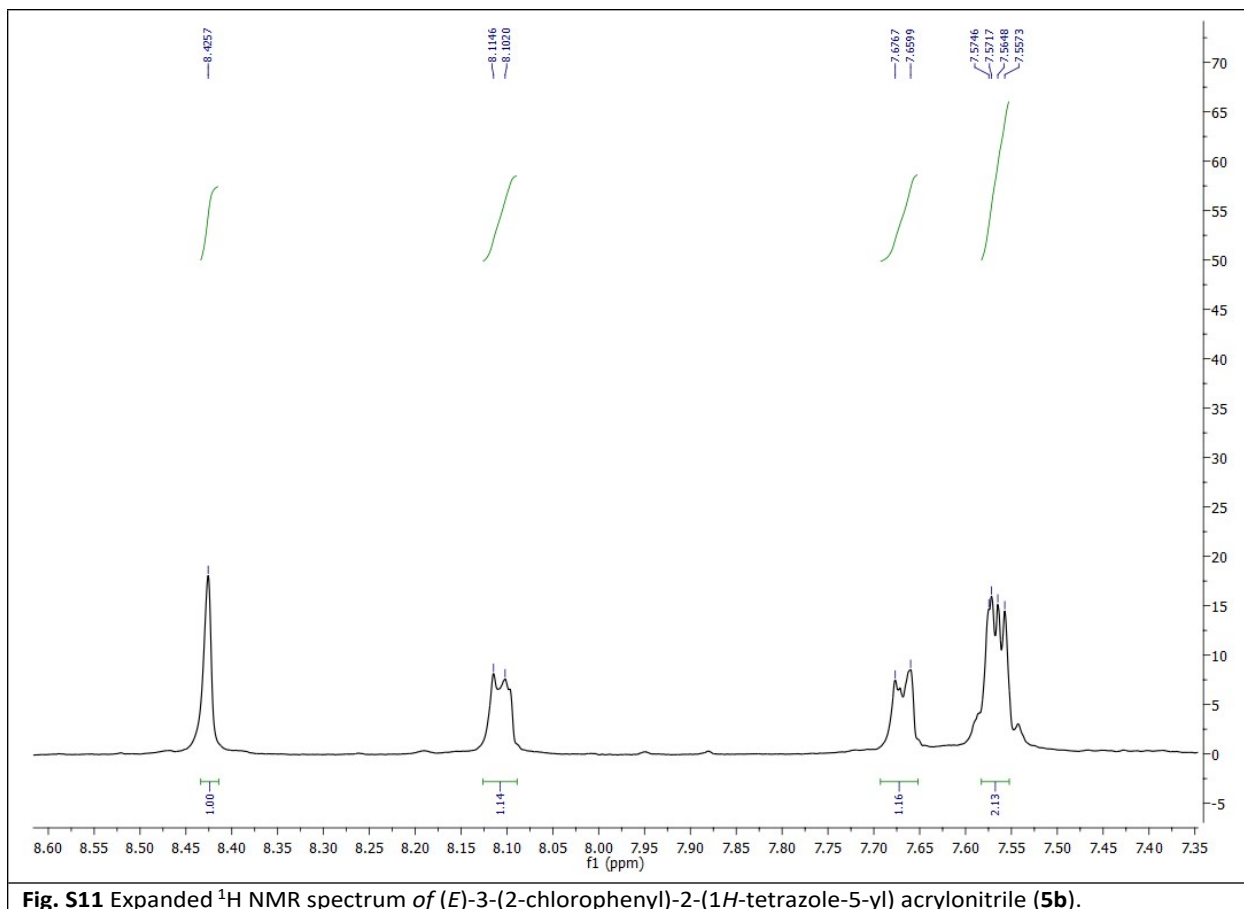

**Fig. S11** Expanded <sup>1</sup>H NMR spectrum of (E)-3-(2-chlorophenyl)-2-(1H-tetrazole-5-yl) acrylonitrile (5b).

**(E)-3-(4-methoxyphenyl)-2-(1H-tetrazole-5-yl) acrylonitrile (5l):**

Pale yellow powder; Mp: 155-158 °C; FT-IR (KBr) v: 3148, 2256, 1573, 1416, 1118, 930, 810, 681, 649 cm<sup>-1</sup>; <sup>1</sup>H NMR (500 MHz, DMSO-*d*<sub>6</sub>): δ (ppm) 7.13-7.14 (d, *J* = 8.3 Hz, 2H), 8.00-8.02 (d, *J* = 8.3 Hz, 2H), 8.27 (s, 1H, CH), 13.40 (s, 1H, NH).

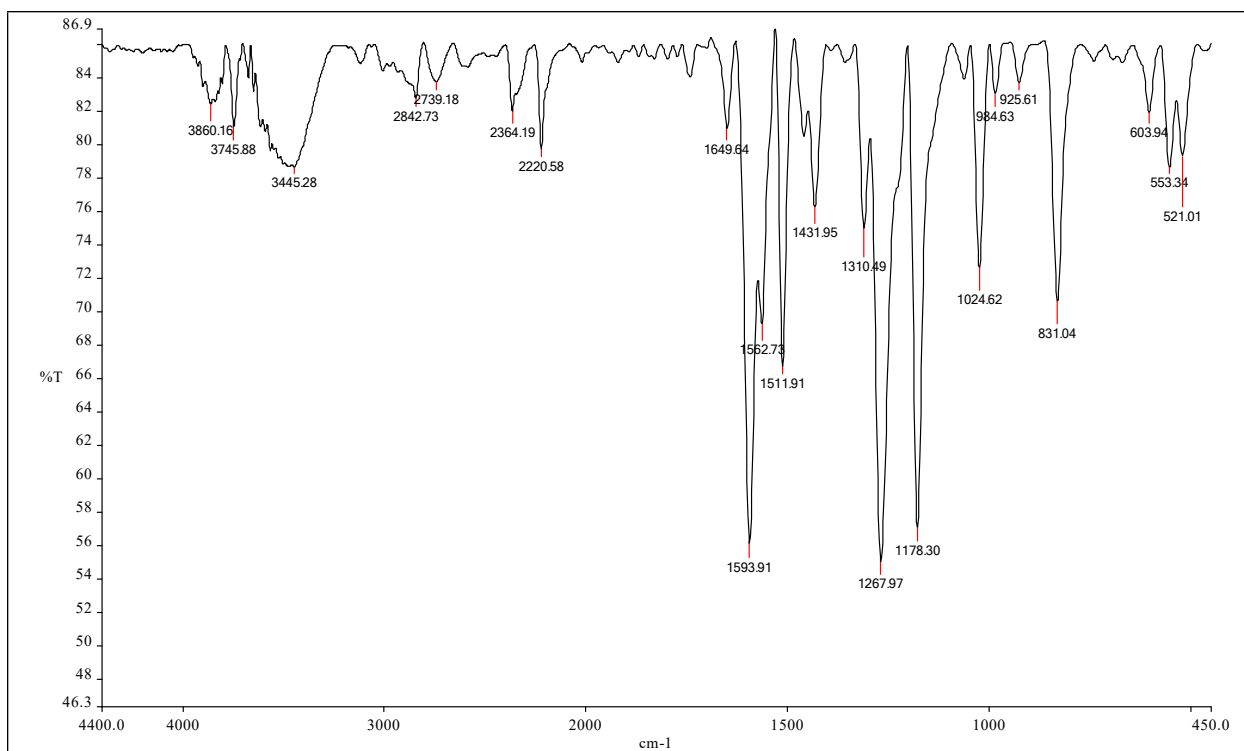

**Fig. S12** FT-IR spectrum of *(E)*-3-(4-methoxyphenyl)-2-(1*H*-tetrazole-5-yl) acrylonitrile (**5I**).

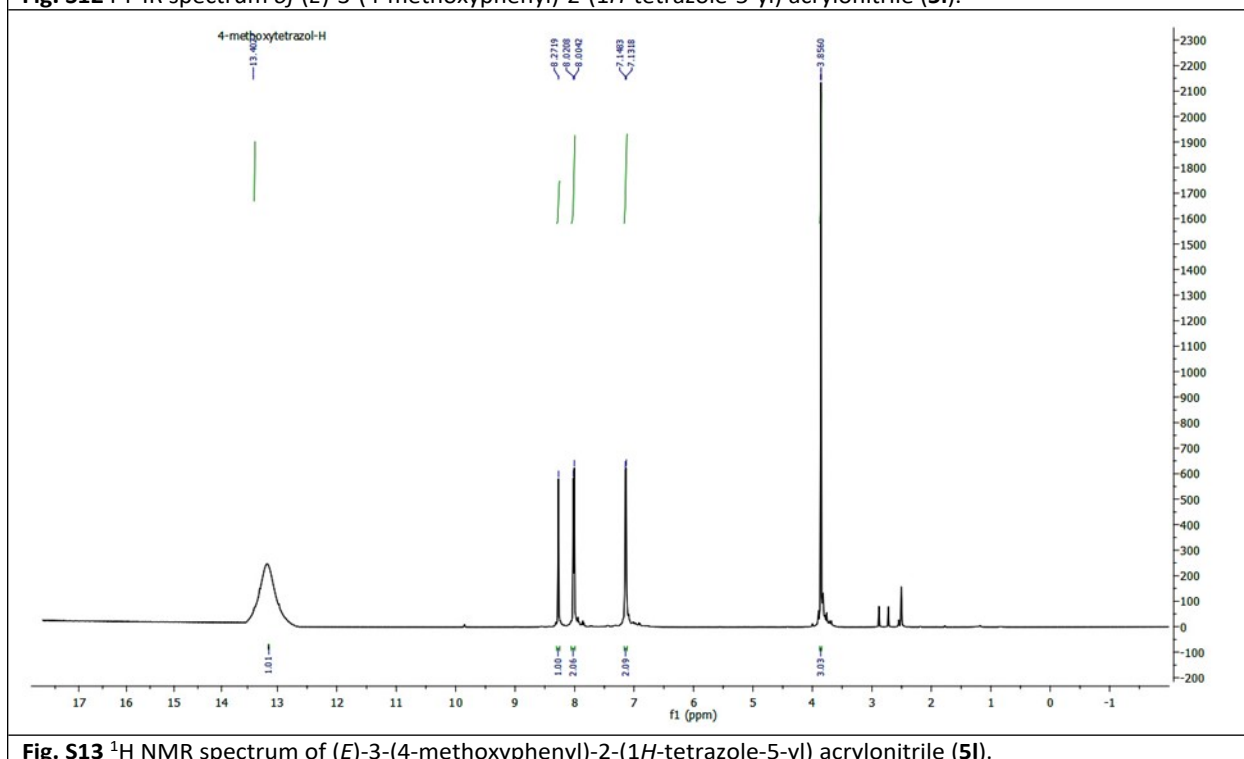

**Fig. S13**  $^1\text{H}$  NMR spectrum of *(E)*-3-(4-methoxyphenyl)-2-(1*H*-tetrazole-5-yl) acrylonitrile (**5I**).

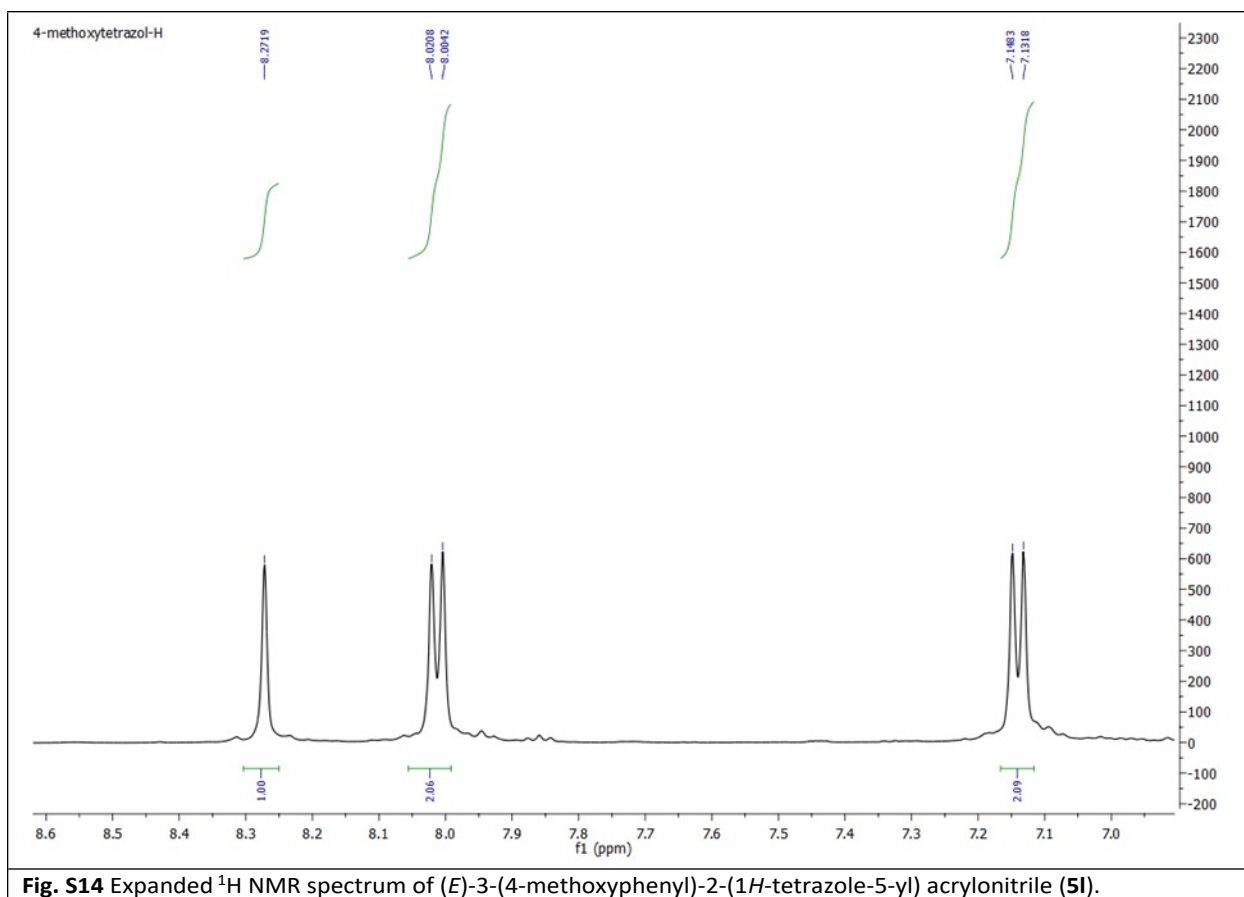

**(*E*)-3-(4-methylphenyl)-2-(1*H*-tetrazole-5-yl) acrylonitrile (**5n**):**

Cream solid powder; Mp: 189-191 °C; FT-IR (KBr)  $\nu$ : 3029, 2217, 1575, 1556, 1376, 1217, 1174, 813, 609  $\text{cm}^{-1}$ ;  $^1\text{H}$  NMR (500 MHz,  $\text{DMSO-}d_6$ ):  $\delta$  (ppm) 7.41-7.43 (d,  $J = 8.0$  Hz, 2H), 7.92-7.94 (d,  $J = 8.0$  Hz, 2H), 8.34 (s, 1H, CH), 13.40 (s, 1H, NH).

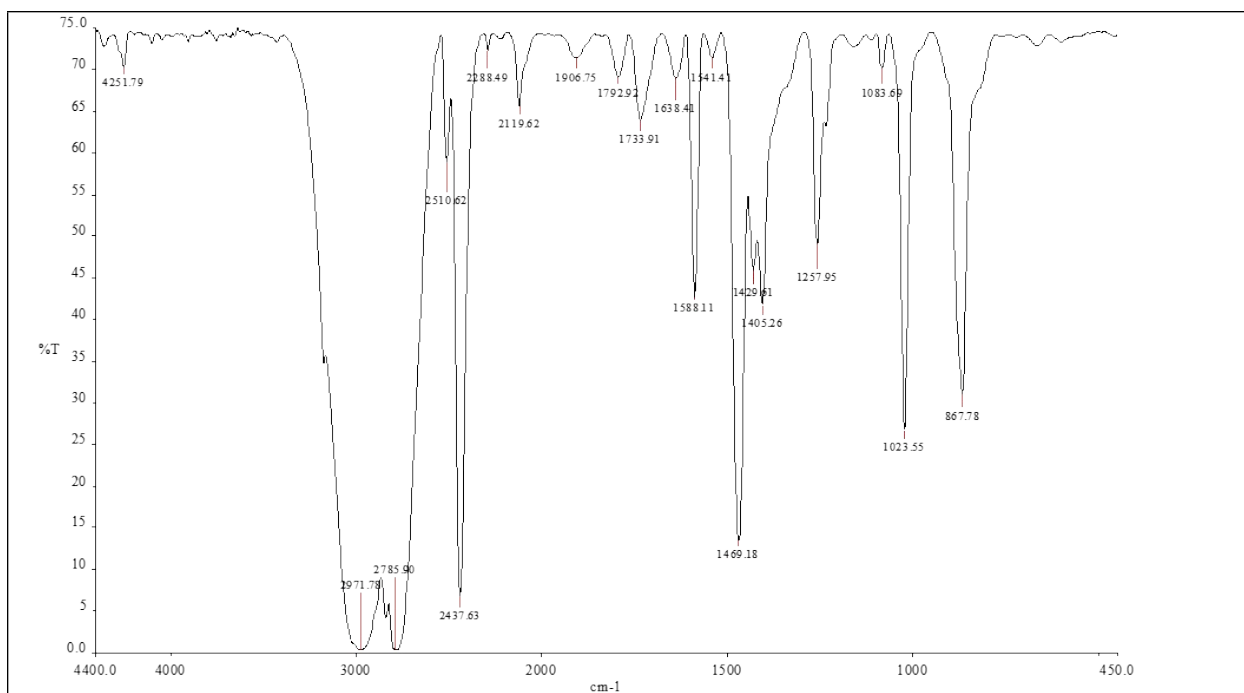

**Fig. S15** FT-IR spectrum of (E)-3-(4-Methylphenyl)-2-(1H-tetrazole-5-yl) acrylonitrile (5n).

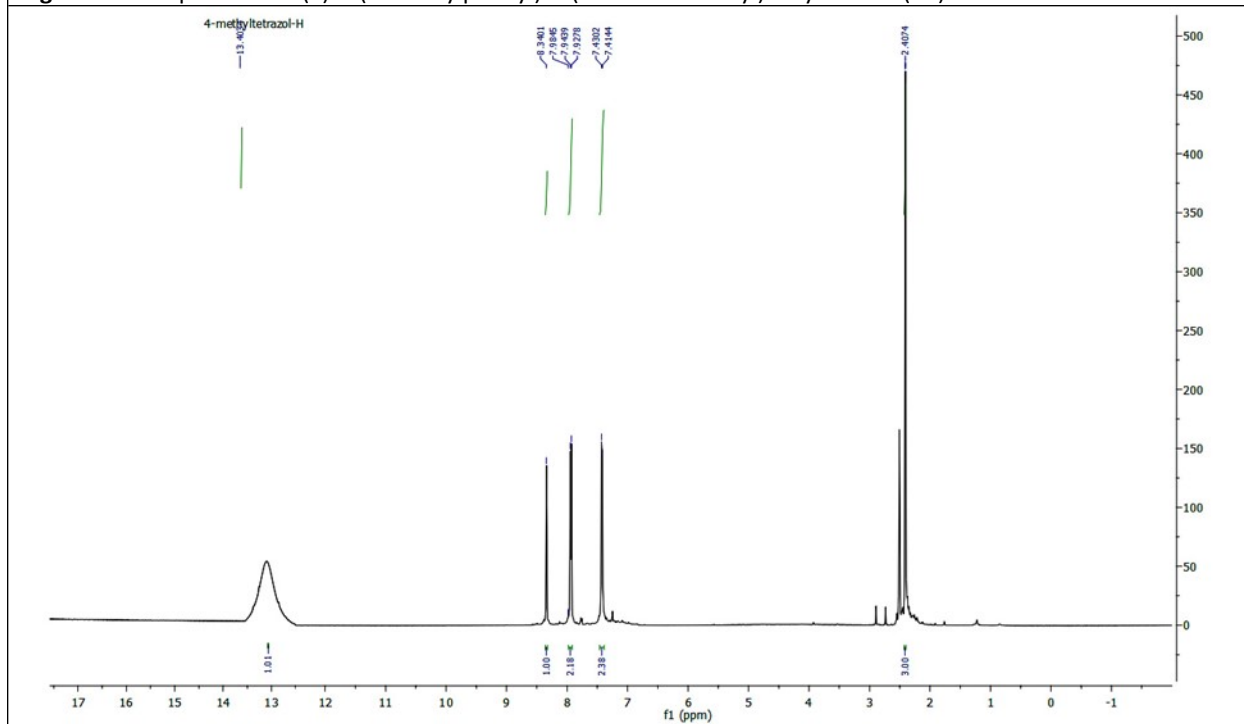

**Fig. S16** <sup>1</sup>H NMR spectrum of (E)-3-(4-Methylphenyl)-2-(1H-tetrazole-5-yl) acrylonitrile (5n).

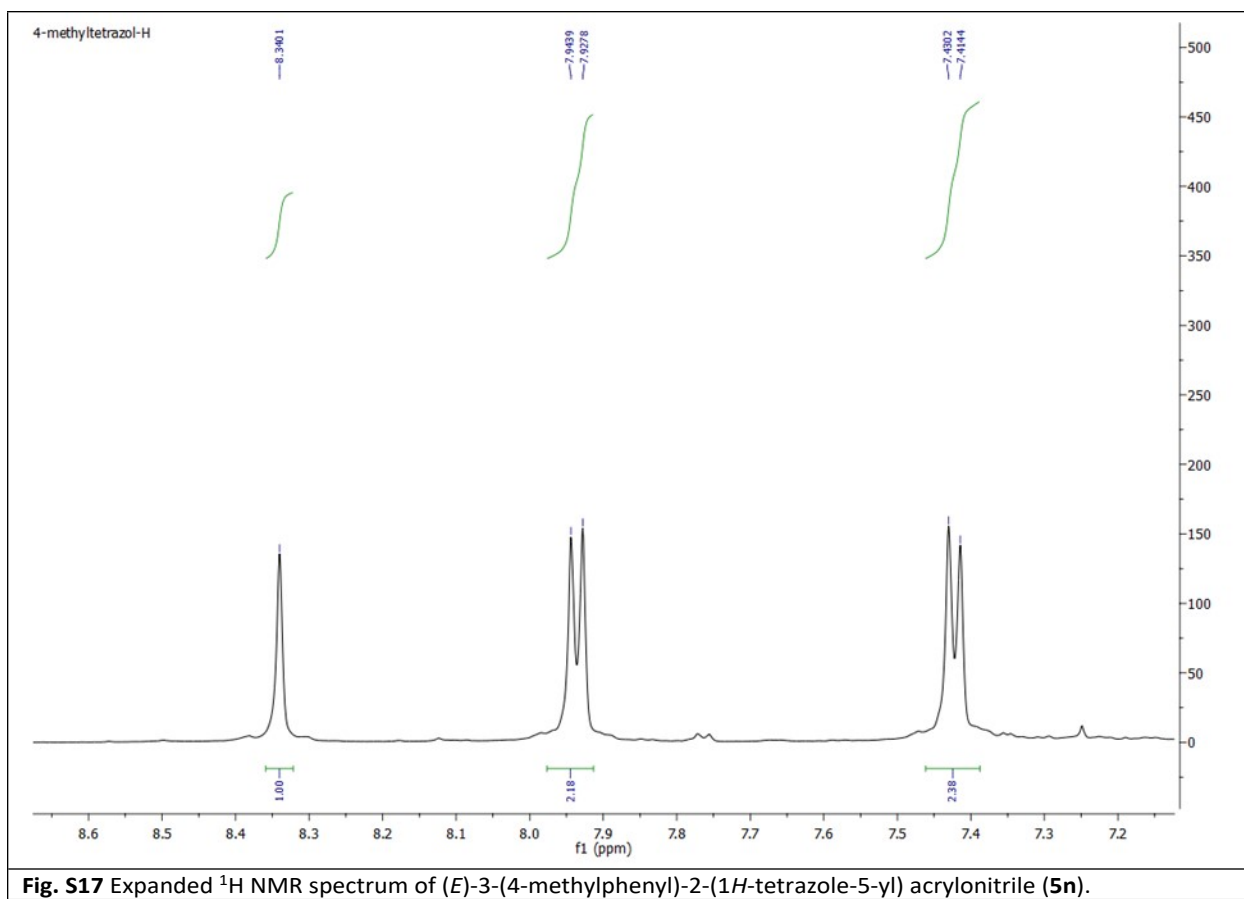

Supplement: d3ra01989f1.pdf [file d3ra01989f1.pdf]
